# Supplementary material
Source: HighWire-hosted journal article supplement (https://jmg.bmj.com/content/56/4/209)
Supplement: inline-supplementary-material-4 [file inline-supplementary-material-4.docx]

**Haniaethol**

Cefndir

Mae cleifion sydd â math 1 niwroffibromatosis (NF1) mewn perygl o gael canser y fron (BC), ond nid oes unrhyw gysylltiad genoteip – ffenoteip wedi'i ddisgrifio.

Dulliau

Cafodd mwtaniadau cyfansoddiadol *NF1* mewn 78 NF1 o gleifion â BC (NF1-BC) eu cymharu â chronfa ddata amrywiad agored *NF1* Leiden (N=3432).

Canlyniadau

Ni welwyd unrhyw achosion gyda dileu genynnau'n gyfan gwbl neu'n rhannol (Cymhareb perygl (CP) 0.10; 95% CI: 0.006 – 1.63; p = 0.014, pysgotwr yn union), a dim perthnasoedd gros â safle mwtaniad. Ddeugain pump (64.3%; CP 6.4 – 83) o'r 70 o fwtaniadau gwahanol yn amlach na'r disgwyl (p < 0.05), tra bo 52 (74.3%; Roedd CP 5.3 – 83) yn arwyddocaol ar ôl addasu ar gyfer cymariaethau lluosog (wedi'u haddasu yn ôl y 0.125; Benjamini-Hochberg). Hefyd, gwelwyd cyfrannau uwch o fwgan a oedd yn nonsens ac yn gamarweiniol (wedi'u haddasu p = 0.254; Benjamini-Hochberg). Digwyddodd deg o'r 11 o achosion o gamsynnwyr gyda'r oedran hysbys o BC yn < 50 y (p = 0.041). Cafodd 18 o achosion *BRCA1/2* o brofion, gan ddatgelu un mwtaniad *BRCA2*.

Drafodaeth

Mae'r data hyn yn cefnogi'n gryf y rhagdybiaeth bod rhai mathau o mwtaniad cyfansoddiadol, ac yn wir, rhai amrywiolion penodol yn *NF1* yn rhoi risgiau gwahanol i BC. Mae diffyg diddymiadau mawr a gormodedd o nonsens a mwtaniadau camsynnwyr yn gyson ag ennill swyddogaeth mwtaniadau sy'n rhoi risg i BC, a hefyd y gall neurofibromin weithredu fel dimer. Mae'r sylwad y gall chwyddo *NF1* yn annibynnol o *ERBB2* helaethiad yn achlysurol yn y BC yn cefnogi'r cysyniad hwn. Mae angen sefydlu astudiaeth molecwlaidd arfaethedig o NF1-BC er mwyn cadarnhau ac adeiladu ar y canfyddiadau hyn, ond waeth beth fo *NF1* statws mwtaniad NF1-BC Mae cleifion yn cyfiawnhau profi genynnau eraill sy'n rhagwaredu.
